# Supplementary material
Source: PubMed Central journal article supplement (PMC2825283)
Supplement: NIHMS165284-supplement-Online_supplement.pdf [file NIHMS165284-supplement-Online_supplement.pdf]

## ONLINE SUPPLEMENT

### **Dietary phosphorus, blood pressure and incidence of hypertension in the Atherosclerosis Risk in Communities (ARIC) Study and the Multi-Ethnic Study of Atherosclerosis (MESA)**

Alvaro Alonso, Jennifer A. Nettleton, Joachim H. Ix, Ian H. de Boer, Aaron R. Folsom, Aurelian Bidulescu, Bryan R. Kestenbaum, Lloyd E. Chambless, David R. Jacobs Jr.

## SUPPLEMENTAL METHODS

### **Assessment of other covariates**

In both ARIC and MESA, trained technicians measured height, weight, and waist circumference following a standardized protocol. Diabetes was defined as current use of glucose-lowering medications, fasting glucose  $\geq 126$  mg/dL, nonfasting glucose  $\geq 200$  mg/dL, or, only in ARIC, self-reported history of diabetes. Estimated glomerular filtration rate (eGFR) was calculated using the abbreviated Modification of Diet in Renal Disease Study equation.<sup>1</sup> Current smoking, ethanol intake, income, education, and previous history of cardiovascular disease were ascertained from standardized questionnaires. Physical activity was assessed at baseline using a modification of the Baecke Physical Activity questionnaire in ARIC<sup>2</sup> and an activity questionnaire adapted from the Cross-Cultural Activity Participation Study in MESA.<sup>3</sup>

### **Statistical analysis**

Because concerns exist about the use of Cox regression when the event is measured at discrete points, we repeated the analysis using Poisson (log-link) regression to model the incidence rate ratio of hypertension as a function of predictor covariates with robust variance estimation and an offset for follow-up time.

Statistical models were stratified by race, sex, and eGFR to explore potential interactions. Formal interaction tests were conducted including multiplicative terms in the models, and comparing models with and without interactions with a likelihood ratio test.

Additionally, three supplementary analyses were carried out to evaluate the robustness of our results to different assumptions. First, we repeated the longitudinal analysis defining incident hypertension only based on BP levels, ignoring use of antihypertensive medication, to avoid differences in hypertension diagnosis based on healthcare access or utilization. Second, we performed a longitudinal analysis excluding those with systolic BP  $\geq 130$  or diastolic BP  $\geq 80$  at baseline to reduce the possibility of including individuals who already had hypertension but were not identified in the baseline exam. Finally, we applied regression calibration to correct for measurement error in dietary intake assessment in both ARIC and MESA using the SAS macro %RELIB.<sup>4</sup> This SAS

macro adjusts point and confidence intervals of coefficients obtained from linear and Cox proportional hazards models for measurement error due to random within-person variation, using information from repeated dietary measures in a smaller sample of individuals. Repeatability was determined in 1004 ARIC participants who completed FFQs at baseline and three years later. In this analysis, we estimated the association of an increment of 500 mg of phosphorus intake with systolic BP and the risk of incident hypertension. The analysis corrected measurement error in the intake of the following nutrients: phosphorus, alcohol, calcium, magnesium, potassium, sodium, and total energy intake. The correlation coefficients between the repeated measures were 0.56 (phosphorus), 0.62 (alcohol), 0.55 (calcium), 0.54 (magnesium), 0.55 (potassium), 0.50 (sodium) and 0.58 (total energy intake). No repeatability information was available for MESA.

### References

1. Levey AS, Bosch JP, Lewis JB, Greene T, Rogers N, Roth D, for the Modification of Diet in Renal Disease Study Group. A more accurate method to estimate glomerular filtration rate from serum creatinine: a new prediction equation. *Ann Intern Med.* 1999;130:461-470.
2. Baecke JAH, Burema J, Fritjers JER. A short questionnaire for the measurement of habitual physical activity in epidemiological studies. *Am J Clin Nutr.* 1982;36:936-942.
3. Irwin ML, Mayer-Davis EJ, Addy CL, Pate RR, Durstine JL, Stolarczyk LM, Ainsworth BE. Moderate-intensity physical activity and fasting insulin levels in women: the Cross-Cultural Activity Participation Study. *Diabet Care.* 2000;23:449-454.
4. Spiegelman D, McDermott A, Rosner B. Regression calibration method for correcting measurement-error bias in nutritional epidemiology. *Am J Clin Nutr.* 1997;65:1179S-1186S.

## **SUPPLEMENTAL TABLES**

Supplemental table 1. Difference in systolic blood pressure by quintiles of phosphorus intake at baseline, by sex, ARIC, 1987-89, and MESA, 2000-2002

Supplemental table 2. Hazard ratios of hypertension by quintiles of phosphorus intake, by sex, ARIC, 1987-1998, and MESA, 2000-2007

Supplemental table 3. Difference in systolic blood pressure by quintiles of phosphorus intake at baseline, by race/ethnicity, ARIC, 1987-89, and MESA, 2000-2002

Supplemental table 4. Hazard ratios of hypertension by quintiles of phosphorus intake, by race/ethnicity, ARIC, 1987-1998, and MESA, 2000-2007

Supplemental table 5. Difference in systolic blood pressure (SBP) associated with 500 mg/day higher phosphorus intake, before and after correction of measurement error using regression calibration, ARIC and MESA

Supplemental table 6. Hazard ratios of hypertension associated with 500 mg/day higher phosphorus intake, before and after correction of measurement error using regression calibration

Table S1. Difference in systolic blood pressure by quintiles of phosphorus intake at baseline by sex, ARIC, 1987-89, and MESA, 2000-2002

| <b>ARIC</b>   | Q1   | Q2                | Q3                | Q4                | Q5                | P for trend |
|---------------|------|-------------------|-------------------|-------------------|-------------------|-------------|
| <i>Men*</i>   | 868  | 868               | 868               | 868               | 869               |             |
| Model 1       | Ref  | -0.5 (-2.0, 1.0)  | -0.7 (-2.2, 0.8)  | -1.4 (-2.9, 0.1)  | -2.2 (-3.7, -0.7) | 0.002       |
| Model 2       | Ref  | -0.4 (-1.9, 1.1)  | -0.3 (-1.9, 1.2)  | -1.2 (-2.7, 0.4)  | -1.9 (-3.5, -0.4) | 0.008       |
| Model 3       | Ref  | 0.1 (-1.5, 1.8)   | 0.3 (-1.6, 2.2)   | -0.2 (-2.4, 1.9)  | -1.3 (-4.0, 1.3)  | 0.31        |
| <i>Women*</i> | 1088 | 1089              | 1089              | 1089              | 1089              |             |
| Model 1       | Ref. | -0.8 (-2.1, 0.6)  | -1.8 (-3.2, -0.5) | -2.1 (-3.4, -0.7) | -2.9 (-4.3, -1.5) | <0.0001     |
| Model 2       | Ref. | -0.5 (-1.8, 0.9)  | -1.4 (-2.7, -0.1) | -1.7 (-3.1, -0.4) | -2.5 (-3.9, -1.2) | <0.0001     |
| Model 3       | Ref. | -0.3 (-1.8, 1.1)  | -1.2 (-2.9, 0.5)  | -1.8 (-3.7, 0.1)  | -3.0 (-5.4, -0.6) | 0.01        |
| <b>MESA</b>   | Q1   | Q2                | Q3                | Q4                | Q5                | P for trend |
| <i>Men*</i>   | 356  | 356               | 356               | 356               | 356               |             |
| Model 1       | Ref  | -0.7 (-3.3, 1.8)  | -1.3 (-3.8, 1.2)  | -0.7 (-3.2, 1.8)  | -1.5 (-4.0, 1.1)  | 0.31        |
| Model 2       | Ref  | -0.7 (-3.3, 1.8)  | -0.9 (-3.4, 1.7)  | 0.0 (-2.5, 2.6)   | -0.3 (-2.8, 2.2)  | 0.97        |
| Model 3       | Ref  | -0.2 (-3.0, 2.6)  | -0.1 (-3.2, 3.0)  | 0.6 (-2.8, 4.1)   | -0.4 (-4.7, 3.9)  | 0.89        |
| <i>Women*</i> | 375  | 376               | 376               | 376               | 376               |             |
| Model 1       | Ref. | -4.2 (-6.9, -1.5) | -3.4 (-6.0, -0.7) | -4.6 (-7.3, -1.9) | -5.8 (-8.5, -3.1) | 0.0001      |
| Model 2       | Ref. | -3.1 (-5.8, -0.4) | -2.0 (-4.7, 0.7)  | -2.5 (-5.2, 0.2)  | -4.0 (-6.6, -1.3) | 0.01        |
| Model 3       | Ref. | -2.2 (-5.3, 1.0)  | -1.0 (-4.6, 2.7)  | -1.2 (-5.4, 3.0)  | -2.1 (-7.4, 3.2)  | 0.53        |
| <b>Pooled</b> | Q1   | Q2                | Q3                | Q4                | Q5                | P for trend |
| <i>Men</i>    |      |                   |                   |                   |                   |             |
| Model 1       | Ref  | -0.6 (-1.8, 0.7)  | -0.9 (-2.1, 0.4)  | -1.2 (-2.5, 0.1)  | -2.0 (-3.3, -0.7) | 0.002       |
| Model 2       | Ref  | -0.5 (-1.8, 0.8)  | -0.5 (-1.8, 0.8)  | -0.9 (-2.2, 0.5)  | -1.5 (-2.8, 0.1)  | 0.02        |
| Model 3       | Ref  | 0.1 (-1.4, 1.5)   | 0.2 (-1.4, 1.8)   | 0.0 (-1.8, 1.8)   | -1.1 (-3.3, 1.2)  | 0.34        |
| <i>Women</i>  |      |                   |                   |                   |                   |             |
| Model 1       | Ref. | -1.5 (-2.7, -0.3) | -2.1 (-3.4, -0.9) | -2.6 (-3.8, -1.4) | -3.5 (-4.7, -2.3) | <0.0001     |
| Model 2       | Ref. | -1.0 (-2.2, 0.2)  | -1.5 (-2.7, -0.3) | -1.9 (-3.1, -0.7) | -2.8 (-4.1, -1.6) | <0.0001     |
| Model 3       | Ref. | -0.7 (-2.0, 0.7)  | -1.2 (-2.7, 0.4)  | -1.7 (-3.4, 0.1)  | -2.9 (-5.1, -0.7) | 0.009       |

\* Numbers correspond to individuals included in the analysis  
 Model 1: Linear regression model adjusted for age and race; Model 2: Adjusted additionally for body mass index, waist circumference, eGFR, education, income, exercise, cigarette smoking, study site, alcohol intake, and energy intake; Model 3: As model 2, adjusted additionally for calcium, vitamin D (only in ARIC), sodium, potassium, magnesium, fruits and vegetables, and whole grains intake. No interactions were significant at p<0.05; MESA Model 1 interaction term had p-value=0.07, all other p-values were >0.10.

Table S2. Hazard ratios of hypertension by quintiles of phosphorus intake, by sex, ARIC, 1987-1998, and MESA, 2000-2007

| <b>ARIC</b>   | Q1       | Q2                | Q3                | Q4                | Q5                | P for trend |
|---------------|----------|-------------------|-------------------|-------------------|-------------------|-------------|
| <i>Men*</i>   | 200/664  | 218/694           | 218/719           | 212/747           | 175/741           |             |
| Model 1       | 1 (ref.) | 1.04 (0.86, 1.26) | 0.97 (0.80, 1.18) | 0.92 (0.76, 1.12) | 0.77 (0.62, 0.94) | 0.004       |
| Model 2       | 1 (ref.) | 1.09 (0.89, 1.32) | 1.03 (0.84, 1.25) | 0.99 (0.80, 1.22) | 0.82 (0.66, 1.02) | 0.03        |
| Model 3       | 1 (ref.) | 1.08 (0.86, 1.35) | 1.01 (0.79, 1.31) | 0.98 (0.73, 1.31) | 0.82 (0.57, 1.19) | 0.26        |
| <i>Women*</i> | 266/864  | 309/924           | 272/948           | 272/954           | 258/953           |             |
| Model 1       | 1 (ref.) | 1.15 (0.97, 1.35) | 0.99 (0.83, 1.17) | 0.98 (0.82, 1.16) | 0.93 (0.78, 1.10) | 0.12        |
| Model 2       | 1 (ref.) | 1.15 (0.98, 1.36) | 1.02 (0.85, 1.21) | 0.99 (0.83, 1.19) | 0.96 (0.80, 1.15) | 0.27        |
| Model 3       | 1 (ref.) | 1.19 (0.99, 1.44) | 1.07 (0.86, 1.34) | 1.08 (0.84, 1.39) | 1.12 (0.82, 1.54) | 0.65        |
| <b>MESA</b>   | Q1       | Q2                | Q3                | Q4                | Q5                | P for trend |
| <i>Men*</i>   | 94/275   | 98/284            | 89/282            | 97/284            | 97/283            |             |
| Model 1       | 1 (ref.) | 0.85 (0.64, 1.13) | 0.81 (0.60, 1.09) | 0.86 (0.64, 1.15) | 0.83 (0.62, 1.17) | 0.32        |
| Model 2       | 1 (ref.) | 0.92 (0.68, 1.24) | 0.88 (0.65, 1.19) | 0.96 (0.71, 1.31) | 0.94 (0.80, 1.27) | 0.88        |
| Model 3       | 1 (ref.) | 0.97 (0.70, 1.35) | 0.96 (0.66, 1.39) | 1.13 (0.75, 1.71) | 1.55 (0.94, 2.54) | 0.07        |
| <i>Women*</i> | 100/280  | 94/307            | 99/303            | 82/304            | 95/299            |             |
| Model 1       | 1 (ref.) | 0.79 (0.59, 1.05) | 0.88 (0.67, 1.17) | 0.68 (0.50, 0.91) | 0.82 (0.62, 1.10) | 0.19        |
| Model 2       | 1 (ref.) | 0.85 (0.64, 1.15) | 0.97 (0.72, 1.31) | 0.74 (0.54, 1.01) | 0.87 (0.65, 1.17) | 0.32        |
| Model 3       | 1 (ref.) | 0.84 (0.59, 1.20) | 0.92 (0.61, 1.38) | 0.65 (0.40, 1.05) | 0.71 (0.38, 1.31) | 0.28        |
| <b>Pooled</b> | Q1       | Q2                | Q3                | Q4                | Q5                | P for trend |
| <i>Men</i>    |          |                   |                   |                   |                   |             |
| Model 1       | 1 (ref.) | 0.97 (0.83, 1.14) | 0.92 (0.78, 1.08) | 0.90 (0.76, 1.06) | 0.79 (0.66, 0.93) | 0.003       |
| Model 2       | 1 (ref.) | 1.03 (0.87, 1.22) | 0.98 (0.83, 1.16) | 0.98 (0.83, 1.16) | 0.86 (0.72, 1.03) | 0.07        |
| Model 3       | 1 (ref.) | 1.04 (0.87, 1.26) | 1.00 (0.81, 1.23) | 1.03 (0.81, 1.30) | 1.03 (0.77, 1.38) | 0.92        |
| <i>Women</i>  |          |                   |                   |                   |                   |             |
| Model 1       | 1 (ref.) | 1.04 (0.90, 1.20) | 0.96 (0.83, 1.11) | 0.89 (0.77, 1.03) | 0.90 (0.77, 1.04) | 0.05        |
| Model 2       | 1 (ref.) | 1.07 (0.93, 1.24) | 1.00 (0.86, 1.17) | 0.92 (0.79, 1.08) | 0.93 (0.80, 1.09) | 0.15        |
| Model 3       | 1 (ref.) | 1.11 (0.94, 1.31) | 1.03 (0.85, 1.26) | 0.97 (0.77, 1.21) | 1.02 (0.77, 1.35) | 0.96        |

\* Numbers correspond to cases of incident hypertension / participants free of hypertension at baseline

Model 1: Cox proportional hazards model adjusted for age and race. Model 2: Model adjusted additionally for body mass index, waist circumference, eGFR, education, income, exercise, cigarette smoking, study site, alcohol intake, and energy intake. Model 3: Same as model 2, adjusted additionally for calcium, vitamin D (only in ARIC), sodium, potassium, magnesium, fruits and vegetables, and whole grains intake.

All interactions in MESA and ARIC p>0.10

Table S3. Difference in systolic blood pressure by quintiles of phosphorus intake at baseline by race/ethnicity, ARIC, 1987-89, and MESA, 2000-2002

| <b>ARIC</b>               | Q1   | Q2                 | Q3                | Q4                | Q5                 | P for trend |
|---------------------------|------|--------------------|-------------------|-------------------|--------------------|-------------|
| <i>Whites*</i>            | 1308 | 1477               | 1629              | 1696              | 1777               |             |
| Model 1                   | Ref  | -0.6 (-1.7, 0.5)   | -1.1 (-2.2, 0.0)  | -0.9 (-2.0, 0.1)  | -2.1 (-3.2, -1.0)  | 0.0001      |
| Model 2                   | Ref  | -0.4 (-1.5, 0.7)   | -1.0 (-2.1, 0.1)  | -1.1 (-2.2, 0.0)  | -2.3 (-3.4, -1.2)  | <0.0001     |
| Model 3                   | Ref  | -0.5 (-1.7, 0.8)   | -1.1 (-2.4, 0.3)  | -1.3 (-2.8, 0.2)  | -2.9 (-4.7, -1.1)  | 0.002       |
| <i>African-Americans*</i> | 648  | 480                | 328               | 261               | 181                |             |
| Model 1                   | Ref. | -0.5 (-2.7, 1.8)   | -1.5 (-4.1, 1.0)  | -5.7 (-8.5, -2.9) | -4.3 (-7.5, -1.1)  | <0.0001     |
| Model 2                   | Ref. | 0.0 (-2.3, 2.3)    | -0.5 (-3.0, 2.1)  | -4.3 (-7.1, -1.5) | -2.3 (-5.5, 0.8)   | 0.01        |
| Model 3                   | Ref. | 0.9 (-1.7, 3.5)    | 0.8 (-2.6, 4.2)   | -2.8 (-6.9, 1.3)  | -0.8 (-6.5, 4.9)   | 0.63        |
| <b>MESA</b>               | Q1   | Q2                 | Q3                | Q4                | Q5                 | P for trend |
| <i>Whites*</i>            | 267  | 306                | 310               | 361               | 424                |             |
| Model 1                   | Ref. | -0.3 (-3.2, 2.6)   | -3.0 (-5.9, -0.1) | -2.8 (-5.6, 0.0)  | -2.9 (-5.6, -0.2)  | 0.02        |
| Model 2                   | Ref. | 0.3 (-2.5, 3.1)    | -1.8 (-4.7, 1.0)  | -0.2 (-3.0, 2.6)  | -1.0 (-3.6, 1.6)   | 0.45        |
| Model 3                   | Ref. | 1.9 (-1.4, 5.1)    | 0.4 (-3.3, 4.0)   | 2.4 (-1.7, 6.4)   | 1.1 (-3.7, 6.0)    | 0.76        |
| <i>African-Americans*</i> | 211  | 158                | 136               | 101               | 89                 |             |
| Model 1                   | Ref. | -3.9 (-7.9, 0.0)   | -0.9 (-5.1, 3.2)  | -1.2 (-5.7, 3.4)  | -3.4 (-8.2, 1.4)   | 0.32        |
| Model 2                   | Ref. | -1.8 (-5.9, 2.2)   | 1.8 (-2.5, 6.1)   | 1.4 (-3.2, 6.0)   | -1.4 (-6.2, 3.3)   | 0.95        |
| Model 3                   | Ref. | -2.4 (-6.9, 2.1)   | 2.1 (-3.2, 7.5)   | 2.3 (-4.3, 8.8)   | -2.2 (-10.7, 6.3)  | 0.84        |
| <i>Hispanics*</i>         | 176  | 150                | 158               | 158               | 163                |             |
| Model 1                   | Ref  | -2.5 (-6.4, 1.4)   | -4.1 (-7.9, -0.2) | -3.6 (-7.4, 0.2)  | -4.5 (-8.3, -0.7)  | 0.03        |
| Model 2                   | Ref  | -2.1 (-6.0, 1.8)   | -3.2 (-7.2, 0.7)  | -3.1 (-7.0, 0.8)  | -3.5 (-7.3, 0.3)   | 0.09        |
| Model 3                   | Ref  | -0.8 (-5.3, 3.8)   | -1.0 (-6.2, 4.2)  | -0.4 (-6.2, 5.4)  | 2.4 (-5.0, 9.8)    | 0.46        |
| <i>Chinese-Americans*</i> | 77   | 118                | 128               | 112               | 56                 |             |
| Model 1                   | Ref. | -8.3 (-13.3, -3.2) | -2.2 (-7.2, 2.8)  | -3.8 (-8.9, 1.3)  | -8.1 (-14.2, -2.0) | 0.11        |
| Model 2                   | Ref. | -8.0 (-13.0, -2.9) | -2.5 (-7.5, 2.5)  | -4.2 (-9.3, 0.9)  | -5.3 (-11.4, 0.9)  | 0.40        |
| Model 3                   | Ref. | -8.5 (-14.6, -2.4) | -4.2 (-11.0, 2.6) | -5.7 (-13.3, 1.9) | -8.3 (-19.1, 2.4)  | 0.28        |
| <b>Pooled</b>             | Q1   | Q2                 | Q3                | Q4                | Q5                 | P for trend |
| <i>Whites</i>             |      |                    |                   |                   |                    |             |
| Model 1                   | Ref  | -0.5 (-1.6, 0.5)   | -1.3 (-2.4, 0.3)  | -1.2 (-2.2, -0.2) | -2.2 (-3.2, -1.2)  | <0.0001     |
| Model 2                   | Ref  | -0.3 (-1.4, 0.7)   | -1.1 (-2.2, -0.1) | -1.0 (-2.0, 0.0)  | -2.1 (-3.1, -1.1)  | <0.0001     |
| Model 3                   | Ref  | -0.2 (-1.3, 1.0)   | -0.9 (-2.2, 0.4)  | -0.9 (-2.3, 0.6)  | -2.4 (-4.1, -0.7)  | 0.005       |
| <i>African-Americans</i>  |      |                    |                   |                   |                    |             |
| Model 1                   | Ref. | -1.3 (-3.3, 0.6)   | -1.4 (-3.5, 0.8)  | -4.5 (-6.8, -2.1) | -4.0 (-6.7, -1.4)  | <0.0001     |
| Model 2                   | Ref. | -0.4 (-2.4, 1.5)   | 0.1 (-2.1, 2.3)   | -2.8 (-5.2, -0.4) | -2.1 (-4.7, 0.6)   | 0.03        |
| Model 3                   | Ref. | 0.1 (-2.2, 2.3)    | 1.2 (-1.7, 4.0)   | -1.4 (-4.8, 2.1)  | -1.2 (-6.0, 3.5)   | 0.61        |

\* Numbers correspond to individuals included in the analyses

Model 1: Linear regression model adjusted for age and sex

Model 2: Adjusted additionally for body mass index, waist circumference, eGFR, education, income, exercise, cigarette smoking, study site, alcohol intake, and energy intake

Model 3: As model 2, adjusted additionally for calcium, vitamin D (only in ARIC), sodium, potassium, magnesium, fruits and vegetables, and whole grains intake.

Interaction ARIC Model 1, p-value=0.006. Other interaction p-values > 0.10

Table S4. Hazard ratios of hypertension by quintiles of phosphorus intake, by race/ethnicity, ARIC, 1987-1998, and MESA, 2000-2007

| <b>ARIC</b>               | Q1       | Q2                | Q3                | Q4                | Q5                | P for trend |
|---------------------------|----------|-------------------|-------------------|-------------------|-------------------|-------------|
| <i>Whites*</i>            | 302/1111 | 378/1292          | 390/1432          | 403/1516          | 387/1562          |             |
| Model 1                   | 1 (ref.) | 1.05 (0.90, 1.22) | 0.94 (0.81, 1.09) | 0.91 (0.78, 1.06) | 0.84 (0.72, 0.98) | 0.003       |
| Model 2                   | 1 (ref.) | 1.08 (0.92, 1.26) | 0.99 (0.85, 1.15) | 0.95 (0.82, 1.11) | 0.88 (0.75, 1.03) | 0.02        |
| Model 3                   | 1 (ref.) | 1.11 (0.93, 1.32) | 1.02 (0.84, 1.24) | 0.99 (0.80, 1.23) | 0.97 (0.74, 1.26) | 0.57        |
| <i>African-Americans*</i> | 164/417  | 149/326           | 100/235           | 81/185            | 46/132            |             |
| Model 1                   | 1 (ref.) | 1.19 (0.96, 1.49) | 1.10 (0.86, 1.41) | 1.09 (0.83, 1.42) | 0.81 (0.58, 1.13) | 0.39        |
| Model 2                   | 1 (ref.) | 1.21 (0.96, 1.52) | 1.08 (0.83, 1.40) | 1.06 (0.80, 1.40) | 0.83 (0.59, 1.17) | 0.41        |
| Model 3                   | 1 (ref.) | 1.26 (0.96, 1.65) | 1.18 (0.83, 1.66) | 1.18 (0.77, 1.81) | 0.96 (0.53, 1.75) | 0.77        |
| <b>MESA</b>               | Q1       | Q2                | Q3                | Q4                | Q5                | P for trend |
| <i>Whites*</i>            | 75/218   | 77/246            | 81/262            | 87/298            | 125/348           |             |
| Model 1                   | 1 (ref.) | 0.79 (0.58, 1.09) | 0.75 (0.55, 1.03) | 0.72 (0.53, 0.98) | 0.90 (0.67, 1.20) | 0.90        |
| Model 2                   | 1 (ref.) | 0.79 (0.57, 1.10) | 0.73 (0.52, 1.02) | 0.72 (0.52, 1.01) | 0.91 (0.67, 1.22) | 0.96        |
| Model 3                   | 1 (ref.) | 0.79 (0.54, 1.14) | 0.81 (0.53, 1.24) | 0.89 (0.56, 1.43) | 1.52 (0.89, 2.60) | 0.03        |
| <i>African-Americans*</i> | 66/153   | 47/128            | 43/104            | 26/72             | 27/60             |             |
| Model 1                   | 1 (ref.) | 0.71 (0.49, 1.03) | 0.95 (0.64, 1.39) | 0.74 (0.47, 1.17) | 1.00 (0.64, 1.56) | 0.94        |
| Model 2                   | 1 (ref.) | 0.86 (0.58, 1.29) | 1.17 (0.77, 1.78) | 0.86 (0.54, 1.39) | 1.22 (0.76, 1.96) | 0.46        |
| Model 3                   | 1 (ref.) | 0.93 (0.58, 1.50) | 1.59 (0.94, 2.71) | 1.17 (0.58, 2.34) | 1.41 (0.55, 3.64) | 0.30        |
| <i>Hispanics*</i>         | 33/124   | 48/113            | 36/122            | 45/129            | 32/130            |             |
| Model 1                   | 1 (ref.) | 1.49 (0.95, 2.33) | 1.01 (0.63, 1.63) | 1.12 (0.71, 1.77) | 0.77 (0.47, 1.25) | 0.08        |
| Model 2                   | 1 (ref.) | 1.35 (0.85, 2.15) | 1.00 (0.61, 1.65) | 1.01 (0.63, 1.62) | 0.75 (0.45, 1.24) | 0.07        |
| Model 3                   | 1 (ref.) | 1.31 (0.74, 2.34) | 0.77 (0.38, 1.55) | 0.66 (0.31, 1.40) | 0.48 (0.19, 1.24) | 0.08        |
| <i>Chinese-Americans*</i> | 20/60    | 20/104            | 28/97             | 21/89             | 8/44              |             |
| Model 1                   | 1 (ref.) | 0.49 (0.26, 0.91) | 0.75 (0.42, 1.32) | 0.51 (0.27, 0.94) | 0.35 (0.15, 0.79) | 0.02        |
| Model 2                   | 1 (ref.) | 0.53 (0.27, 1.02) | 0.89 (0.49, 1.61) | 0.56 (0.29, 1.08) | 0.32 (0.13, 0.78) | 0.03        |
| Model 3                   | 1 (ref.) | 0.47 (0.21, 1.07) | 0.61 (0.11, 0.82) | 0.30 (0.11, 0.82) | 0.12 (0.02, 0.56) | 0.01        |
| <b>Pooled</b>             | Q1       | Q2                | Q3                | Q4                | Q5                | P for trend |
| <i>Whites</i>             |          |                   |                   |                   |                   |             |
| Model 1                   | 1 (ref.) | 1.00 (0.87, 1.14) | 0.90 (0.79, 1.03) | 0.87 (0.76, 1.00) | 0.85 (0.75, 0.98) | 0.006       |
| Model 2                   | 1 (ref.) | 1.02 (0.88, 1.17) | 0.94 (0.81, 1.08) | 0.91 (0.79, 1.04) | 0.88 (0.77, 1.02) | 0.04        |
| Model 3                   | 1 (ref.) | 1.04 (0.89, 1.22) | 0.98 (0.82, 1.17) | 0.97 (0.80, 1.19) | 1.06 (0.83, 1.34) | 0.69        |
| <i>African-Americans</i>  |          |                   |                   |                   |                   |             |
| Model 1                   | 1 (ref.) | 1.04 (0.86, 1.26) | 1.05 (0.85, 1.29) | 0.98 (0.78, 1.24) | 0.87 (0.67, 1.13) | 0.43        |
| Model 2                   | 1 (ref.) | 1.12 (0.91, 1.36) | 1.10 (0.89, 1.37) | 1.00 (0.79, 1.28) | 0.95 (0.72, 1.25) | 0.74        |
| Model 3                   | 1 (ref.) | 1.17 (0.93, 1.48) | 1.29 (0.96, 1.72) | 1.18 (0.82, 1.70) | 1.07 (0.65, 1.78) | 0.44        |

\* Numbers correspond to cases of incident hypertension / participants free of hypertension at baseline.

Model 1: Cox proportional hazards model adjusted for age and sex. Model 2: Model adjusted additionally for body mass index, waist circumference, eGFR, education, income, exercise, cigarette smoking, study site, alcohol intake, and energy intake. Model 3: Same as model 2, adjusted additionally for calcium,



vitamin D (only in ARIC), sodium, potassium, magnesium, fruits and vegetables,  
and whole grains intake.  
All interactions  $p > 0.10$

Table S5. Difference in systolic blood pressure associated with 500 mg/day higher phosphorus intake, before and after correction of measurement error using regression calibration, ARIC, 1987-89, and MESA, 2000-2002

| Cohort        | Uncorrected           |         | Corrected             |         |
|---------------|-----------------------|---------|-----------------------|---------|
|               | $\Delta$ SBP (95% CI) | p-value | $\Delta$ SBP (95% CI) | p-value |
| <b>ARIC</b>   |                       |         |                       |         |
| Model 1       | -1.3 (-1.9, -0.7)     | <0.0001 | -2.0 (-2.9, -1.0)     | <0.0001 |
| Model 2       | -1.1 (-1.8, -0.5)     | 0.0002  | -2.1 (-3.0, -1.1)     | <0.0001 |
| Model 3       | -1.3 (-2.5, 0.0)      | 0.05    | -3.7 (-6.4, -0.9)     | 0.009   |
| <b>MESA</b>   |                       |         |                       |         |
| Model 1       | -1.9 (-2.9, -0.8)     | 0.0004  | -2.9 (-4.5, -1.4)     | 0.0003  |
| Model 2       | -0.9 (-2.0, 0.1)      | 0.07    | -1.5 (-3.0, 0.1)      | 0.06    |
| Model 3       | -0.5 (-2.8, 1.8)      | 0.68    | NE                    | NE      |
| <b>Pooled</b> |                       |         |                       |         |
| Model 1       | -1.4 (-1.9, -0.9)     | <0.0001 | -2.2 (-3.0, -1.4)     | <0.0001 |
| Model 2       | -1.1 (-1.6, -0.6)     | <0.0001 | -1.9 (-2.7, -1.1)     | <0.0001 |
| Model 3       | -1.1 (-2.2, 0.0)      | 0.06    | NE                    | NE      |

CI: confidence interval; NE: not estimable due to computational problems; SBP: systolic blood pressure

Model 1: Linear regression model adjusted for age, sex, race and total energy intake.

Model 2: Linear regression model adjusted for age, sex, race, total energy intake, alcohol intake, study center, body mass index, waist-to-hip ratio, estimated glomerular filtration rate, education, physical activity and smoking.

Model 3: Linear regression model adjusted for same variables as in model 2 plus calcium, magnesium, sodium and potassium intake.

Table S6. Hazard ratios of hypertension associated with 500 mg/day higher phosphorus intake, before and after correction of measurement error using regression-calibration, ARIC, 1987-1998, and MESA, 2000-2007

| Cohort        | Uncorrected       |         | Corrected         |         |
|---------------|-------------------|---------|-------------------|---------|
|               | HR (95% CI)       | p-value | HR (95% CI)       | p-value |
| <b>ARIC</b>   |                   |         |                   |         |
| Model 1       | 0.90 (0.83, 0.97) | 0.008   | 0.85 (0.75, 0.96) | 0.008   |
| Model 2       | 0.91 (0.84, 0.99) | 0.03    | 0.85 (0.75, 0.98) | 0.02    |
| Model 3       | 0.98 (0.83, 1.16) | 0.78    | 0.92 (0.64, 1.32) | 0.65    |
| <b>MESA</b>   |                   |         |                   |         |
| Model 1       | 0.93 (0.83, 1.05) | 0.26    | 0.90 (0.75, 1.08) | 0.24    |
| Model 2       | 0.97 (0.86, 1.09) | 0.61    | 0.95 (0.79, 1.14) | 0.57    |
| Model 3       | 1.10 (0.78, 1.55) | 0.61    | NE                | NE      |
| <b>Pooled</b> |                   |         |                   |         |
| Model 1       | 0.91 (0.85, 0.97) | 0.004   | 0.86 (0.78, 0.95) | 0.004   |
| Model 2       | 0.93 (0.87, 1.00) | 0.04    | 0.88 (0.79, 0.99) | 0.03    |
| Model 3       | 1.00 (0.86, 1.16) | 0.98    | NE                | NE      |

NE: not estimable due to computational problems

Model 1: Cox proportional hazards model adjusted for age, sex, race and total energy intake.

Model 2: Cox proportional hazards model adjusted for age, sex, race, total energy intake, alcohol intake, study center, body mass index, waist-to-hip ratio, estimated glomerular filtration rate, education, physical activity and smoking.

Model 3: Cox proportional hazards model adjusted for same variables as in model 2 plus calcium, magnesium, sodium and potassium intake.
